# Supplementary material
Source: Royal Society of Chemistry journal article supplement (doi:10.1039/d6lf00006a)
Supplement: d6lf00006a1.pdf [file d6lf00006a1.pdf]

## Supplementary Information

# Effect of Temperature Dependence of Deformation Polarizability and Ionization energy of Solvents on Surface Properties of Solid Materials

Tayssir Hamieh <sup>a,b,c\*</sup>

<sup>a</sup> Faculty of Science and Engineering, Maastricht University, P.O. Box 616, 6200 MD Maastricht, The Netherlands, Email: [t.hamieh@maastrichtuniversity.nl](mailto:t.hamieh@maastrichtuniversity.nl)

<sup>b</sup> Institut de Science des Matériaux de Mulhouse, Université de Haute-Alsace, CNRS, IS2M UMR 7361, F-68100 Mulhouse, France

<sup>c</sup> Laboratory of Materials, Catalysis, Environment and Analytical Methods Laboratory (MCEMA), Faculty of Sciences, Lebanese University, Hadath, Lebanon

**Table S1.** Corrected donor  $DN$  and acceptor  $DN'$  electron numbers and dipole moment  $\mu$  (in D) of organic solvents with the different Lewis acid-base character.

| Probe           | $DN$  | $AN$ | Lewis character       | $\mu$ (D) | Comment                                           |
|-----------------|-------|------|-----------------------|-----------|---------------------------------------------------|
| $\text{CCl}_4$  | 0.00  | 2.3  | weak acid             | 0         | no permanent dipole                               |
| Chloroform      | 0     | 18.7 | Stronger acid         | 1.04      | Moderately polar                                  |
| Benzene         | 0.25  | 0.6  | Weaker amphoteric     | 0         | Perfectly symmetric aromatic molecule             |
| Dichloromethane | 3     | 13.5 | More acid             | 1.6       | Polar due to asymmetric C–Cl bonds                |
| Nitromethane    | 6.75  | 14.8 | Amphoteric more acid  | 3.46      | Strongly polar nitro group                        |
| Toluene         | 9.75  | 3.3  | Amphoteric            | 0.37      | Very weak permanent dipole; $\pi$ -electron donor |
| Acetonitrile    | 35.25 | 16.3 | Amphoteric more basic | 3.92      | Highly polar nitrile                              |
| Acetone         | 42.5  | 8.7  | Amphoteric more basic | 2.88      | Strong dipole from C=O group                      |
| Ethyl acetate   | 42.75 | 5.3  | Strong base           | 1.78      | Polar aprotic solvent                             |
| Diethyl ether   | 48    | 4.9  | Strong base           | 1.15      | Polar; oxygen lone pairs dominate                 |
| THF             | 50    | 1.9  | Strongest base        | 1.75      | Strongly polar ether                              |

**Table S2.** Variations of the deformation polarizability  $\alpha_0$  (in  $10^{-40}$  C m<sup>2</sup> V<sup>-1</sup>) of solvents and solid materials as a function of temperature.

| Temperature (K)                 | 323.15 | 343.15 | 363.15 | 383.15 |
|---------------------------------|--------|--------|--------|--------|
| n-Hexane                        | 13.315 | 13.373 | 13.431 | 13.489 |
| n-Heptane                       | 15.243 | 15.313 | 15.383 | 15.453 |
| n-Octane                        | 17.810 | 17.896 | 17.982 | 18.068 |
| n-Nonane                        | 19.427 | 19.523 | 19.619 | 19.715 |
| CCl <sub>4</sub>                | 12.121 | 12.165 | 12.209 | 12.253 |
| Nitromethane                    | 8.242  | 8.268  | 8.294  | 8.320  |
| CH <sub>2</sub> Cl <sub>2</sub> | 8.048  | 8.072  | 8.096  | 8.120  |
| Chloroform                      | 9.901  | 9.935  | 9.969  | 10.003 |
| Diethyl ether                   | 10.579 | 10.621 | 10.663 | 10.705 |
| THF                             | 9.184  | 9.220  | 9.256  | 9.292  |
| Ethyl acetate                   | 10.258 | 10.308 | 10.358 | 10.408 |
| Acetone                         | 7.117  | 7.139  | 7.161  | 7.183  |
| Acetonitrile                    | 4.946  | 4.960  | 4.974  | 4.988  |
| Toluene                         | 13.186 | 13.234 | 13.282 | 13.330 |
| Benzene                         | 11.577 | 11.619 | 11.661 | 11.703 |
| Alumina                         | 5.957  | 5.963  | 5.969  | 5.975  |
| Titania                         | 7.948  | 7.963  | 7.978  | 7.993  |
| MgO                             | 6.128  | 6.122  | 6.116  | 6.110  |

**Table S3.** Variations of the ionization energy  $\varepsilon(T)$  (in J/mol) of solvents and solid materials as a function of temperature.

| Temperature (K)                 | 323.15  | 343.15  | 363.15  | 383.15  |
|---------------------------------|---------|---------|---------|---------|
| n-Hexane                        | 977328  | 977378  | 977428  | 977478  |
| n-Heptane                       | 958034  | 958084  | 958134  | 958184  |
| n-Octane                        | 945497  | 945551  | 945605  | 945659  |
| n-Nonane                        | 936817  | 936873  | 936929  | 936985  |
| CCl <sub>4</sub>                | 1106589 | 1106629 | 1106669 | 1106709 |
| Nitromethane                    | 1068995 | 1069059 | 1069123 | 1069187 |
| CH <sub>2</sub> Cl <sub>2</sub> | 1092143 | 1092203 | 1092263 | 1092323 |
| Chloroform                      | 1096969 | 1097031 | 1097093 | 1097155 |
| Diethyl ether                   | 917535  | 917601  | 917667  | 917733  |
| THF                             | 904996  | 905064  | 905132  | 905200  |
| Ethyl acetate                   | 965769  | 965833  | 965897  | 965961  |
| Acetone                         | 936147  | 936207  | 936267  | 936327  |

|              |         |         |         |         |
|--------------|---------|---------|---------|---------|
| Acetonitrile | 1177041 | 1177103 | 1177165 | 1177227 |
| Toluene      | 851695  | 851755  | 851815  | 851875  |
| Benzene      | 891847  | 891907  | 891967  | 892027  |
| Alumina      | 577465  | 577465  | 577465  | 577465  |
| Titania      | 916488  | 916488  | 916488  | 916488  |
| MgO          | 737648  | 737648  | 737648  | 737648  |

**Table S4.** Variations of the free energy of adsorption ( $-\Delta G_a^0(T)$ ) (in kJ/mol) of solvents on alumina as a function of temperature  $T$ .

|                                 |        |        |        |        |
|---------------------------------|--------|--------|--------|--------|
| Temperature (K)                 | 323.15 | 343.15 | 363.15 | 383.15 |
| n-Hexane                        | 28.716 | 28.776 | 28.827 | 28.878 |
| n-Heptane                       | 31.857 | 31.774 | 31.692 | 31.609 |
| n-Octane                        | 35.117 | 34.813 | 34.510 | 34.207 |
| n-Nonane                        | 38.467 | 37.716 | 37.163 | 36.611 |
| CCl <sub>4</sub>                | 34.514 | 34.449 | 34.435 | 34.420 |
| CH <sub>2</sub> Cl <sub>2</sub> | 59.637 | 57.919 | 56.367 | 54.442 |
| CHCl <sub>3</sub>               | 42.524 | 40.448 | 38.512 | 36.838 |
| Ether                           | 65.062 | 63.377 | 61.763 | 60.317 |
| THF                             | 62.228 | 60.464 | 58.838 | 57.449 |
| Ethyl acetate                   | 66.680 | 64.899 | 62.986 | 61.085 |
| Toluene                         | 46.302 | 45.020 | 44.028 | 43.511 |

**Table S5.** Variations of the free energy of adsorption ( $-\Delta G_a^0(T)$ ) (in kJ/mol) of solvents on titania as a function of temperature  $T$ .

|                                 |        |        |        |        |
|---------------------------------|--------|--------|--------|--------|
| Temperature (K)                 | 323.15 | 343.15 | 363.15 | 383.15 |
| n-Hexane                        | 12.233 | 11.145 | 10.061 | 8.981  |
| n-Heptane                       | 16.137 | 15.048 | 13.963 | 12.882 |
| n-Octane                        | 18.889 | 17.739 | 16.593 | 15.451 |
| n-Nonane                        | 21.792 | 20.513 | 19.239 | 17.968 |
| CH <sub>2</sub> Cl <sub>2</sub> | 10.867 | 9.570  | 8.377  | 6.987  |
| CHCl <sub>3</sub>               | 10.667 | 8.570  | 6.477  | 4.387  |
| THF                             | 25.570 | 24.453 | 23.341 | 22.232 |
| Ethyl Acetate                   | 10.834 | 8.311  | 5.792  | 3.278  |
| Acetone                         | 7.440  | 4.874  | 2.312  | -0.246 |
| Benzene                         | 13.915 | 11.560 | 9.210  | 6.863  |
| Nitromethane                    | 14.816 | 12.536 | 10.261 | 7.989  |
| Acetonitrile                    | 3.591  | 0.691  | -2.205 | -5.098 |

**Table S6.** Variations of the free energy of adsorption ( $-\Delta G_a^0(T)$ ) (in kJ/mol) of solvents on MgO as a function of temperature  $T$ .

| Temperature T (K)               | 323.15 | 343.15 | 363.15 | 383.15 |
|---------------------------------|--------|--------|--------|--------|
| n-Hexane                        | 28.716 | 28.776 | 28.827 | 28.878 |
| n-Heptane                       | 31.857 | 31.774 | 31.692 | 31.609 |
| n-Octane                        | 35.117 | 34.813 | 34.510 | 34.207 |
| n-Nonane                        | 38.467 | 37.716 | 37.163 | 36.611 |
| CH <sub>2</sub> Cl <sub>2</sub> | 60.663 | 60.381 | 59.917 | 59.450 |
| Chloroform                      | 34.514 | 34.449 | 34.435 | 34.420 |
| Diethyl ether                   | 59.637 | 57.919 | 56.367 | 54.442 |
| THF                             | 42.524 | 40.448 | 38.512 | 36.838 |
| Ethyl Acetate                   | 53.277 | 51.481 | 49.553 | 47.618 |
| Acetone                         | 65.062 | 63.377 | 61.763 | 60.317 |
| Acetonitrile                    | 62.228 | 60.464 | 58.838 | 57.449 |
| Toluene                         | 46.302 | 45.020 | 44.028 | 43.511 |

### List of abbreviations

$AN'$ : corrected acceptor number of solvent

C5: n-pentane

C6: n-hexane

C7: n-heptane

C8: n-octane

C9: n-nonane

$DN'$ : corrected donor number of solvent

$H$ : separation distance (in Å)

IGC: inverse gas chromatography

$K_A$ : Lewis acid constant of solid

$K_D$ : Lewis base constant of solid

$m$ : solid mass (in g)

$\mathcal{N}$ : Avogadro's number,

$P_0$ : standard pressure (in Pa)

$\mathcal{P}_{SX}$ : chromatographic index (in  $\text{J} \cdot \text{Å}^6 \cdot \text{mol}^{-1}$ )

$T$ : temperature (in K)

$s$ : specific surface area of the solid (in  $\text{m}^2/\text{g}$ )

THF: tetrahydrofuran

$\alpha_0$ : deformation polarizability (in  $\text{C m}^2 \text{V}^{-1}$ )

$\varepsilon$ : ionization energy (in J/mol)

$\varepsilon_0$ : permittivity of vacuum (in F/m)

$(-\Delta G_a^0)$ : standard Gibbs free energy of adsorption (in J/mol)

$(-\Delta G_a^0)(Ref.)$ : reference free energy of adsorption (in J/mol)

$(-\Delta G_a^d(T))$ : London dispersive energy of adsorption (in J/mol)

$(-\Delta G_a^p(T))$ : polar energy of adsorption (in J/mol)

$(-\Delta H_a^p)$ : polar adsorption enthalpy (in J/mol)

$(-\Delta S_a^p)$ : polar adsorption entropy (in  $\text{J K}^{-1} \text{mol}^{-1}$ )

$\pi_0$ : two-dimensional pressure (N/m)

$\omega_A$ : entropic Lewis acid constant of solid

$\omega_D$ : entropic Lewis base constant of solid.
